# Supplementary material for: Proposition of electronic waste as a reference material – part 2: homogeneity, stability, characterization, and uncertainties
Source: Royal Society of Chemistry journal article supplement (doi:10.1039/c9ja00284g), 2019-01-01

**Proposition of electronic waste as a reference material - Part 2: homogeneity, stability, characterization, and uncertainties**

Daniel Fernandes Andrade, Raquel Cardoso Machado, and Edenir Rodrigues Pereira-Filho\*

Group of Applied Instrumental Analysis, Department of Chemistry, Federal University of São Carlos, Rod Washington Luiz, km 235, zip code 13565-905, São Carlos, SP, Brazil

\*Corresponding author: Group of Applied Instrumental Analysis, Department of Chemistry, Federal University of São Carlos, São Carlos, São Paulo State, zip code 13565-905, Brazil

Phone number: +55 16 3351-8092

E-mail: [erpf@ufscar.br](mailto:erpf@ufscar.br) (E.R. Pereira-Filho)

## Supplementary Information

**Table S1** ANOVA for the homogeneity test of the candidate PCB sample for reference material.

| Element | Source of variance | SS       | DF | MS       | F <sub>cal</sub> | p-Value | F <sub>tab</sub> |
|---------|--------------------|----------|----|----------|------------------|---------|------------------|
| Ag      | Between-bottle     | 0.00046  | 9  | 0.000051 | 2.08             | 0.082   | 2.39             |
|         | Within-bottle      | 0.00049  | 20 | 0.000024 |                  |         |                  |
|         | Total              | 0.00095  | 29 |          |                  |         |                  |
| Al      | Between-bottle     | 6.70     | 9  | 0.74     | 3.16             | 0.01    | 2.39             |
|         | Within-bottle      | 4.71     | 20 | 0.23     |                  |         |                  |
|         | Total              | 11.40    | 29 |          |                  |         |                  |
| As      | Between-bottle     | 335.60   | 9  | 37.29    | 3.60             | 0.0082  | 2.39             |
|         | Within-bottle      | 207.35   | 20 | 10.37    |                  |         |                  |
|         | Total              | 542.95   | 29 |          |                  |         |                  |
| Au      | Between-bottle     | 13111.39 | 9  | 1456.82  | 0.48             | 0.87    | 2.39             |
|         | Within-bottle      | 60843.69 | 20 | 3042.18  |                  |         |                  |
|         | Total              | 73955.07 | 29 |          |                  |         |                  |
| Ba      | Between-bottle     | 0.048    | 9  | 0.0053   | 2.72             | 0.030   | 2.39             |
|         | Within-bottle      | 0.039    | 20 | 0.0020   |                  |         |                  |
|         | Total              | 0.087    | 29 |          |                  |         |                  |
| Cr      | Between-bottle     | 1.16     | 9  | 0.13     | 1.06             | 0.43    | 2.39             |
|         | Within-bottle      | 2.41     | 20 | 0.12     |                  |         |                  |
|         | Total              | 3.57     | 29 |          |                  |         |                  |
| Cu      | Between-bottle     | 329.00   | 9  | 36.56    | 3.09             | 0.017   | 2.39             |
|         | Within-bottle      | 236.49   | 20 | 11.82    |                  |         |                  |
|         | Total              | 565.49   | 29 |          |                  |         |                  |

**Table S1** Continuation

| <b>Element</b> | <b>Source of variance</b> | <b>SS</b> | <b>DF</b> | <b>MS</b> | <b>F<sub>cal</sub></b> | <b>p-Value</b> | <b>F<sub>tab</sub></b> |
|----------------|---------------------------|-----------|-----------|-----------|------------------------|----------------|------------------------|
| Fe             | Between-bottle            | 37.00     | 9         | 4.11      | 1.66                   | 0.16           | 2.39                   |
|                | Within-bottle             | 49.39     | 20        | 2.47      |                        |                |                        |
|                | Total                     | 86.39     | 29        |           |                        |                |                        |
| Ni             | Between-bottle            | 0.17      | 9         | 0.019     | 1.34                   | 0.28           | 2.39                   |
|                | Within-bottle             | 0.29      | 20        | 0.014     |                        |                |                        |
|                | Total                     | 0.47      | 29        |           |                        |                |                        |
| Pb             | Between-bottle            | 0.59      | 9         | 0.066     | 6.27                   | 0.00032        | 2.39                   |
|                | Within-bottle             | 0.21      | 20        | 0.010     |                        |                |                        |
|                | Total                     | 0.80      | 29        |           |                        |                |                        |
| Sb             | Between-bottle            | 0.10      | 9         | 0.012     | 3.55                   | 0.0087         | 2.39                   |
|                | Within-bottle             | 0.066     | 20        | 0.0033    |                        |                |                        |
|                | Total                     | 0.17      | 29        |           |                        |                |                        |
| Si             | Between-bottle            | 2.80      | 9         | 0.31      | 1.88                   | 0.11           | 2.39                   |
|                | Within-bottle             | 3.30      | 20        | 0.16      |                        |                |                        |
|                | Total                     | 6.10      | 29        |           |                        |                |                        |
| Sn             | Between-bottle            | 5.72      | 9         | 0.64      | 1.42                   | 0.24           | 2.39                   |
|                | Within-bottle             | 8.96      | 20        | 0.45      |                        |                |                        |
|                | Total                     | 14.69     | 29        |           |                        |                |                        |
| Zn             | Between-bottle            | 5.22      | 9         | 0.58      | 3.13                   | 0.016          | 2.39                   |
|                | Within-bottle             | 3.71      | 20        | 0.18      |                        |                |                        |
|                | Total                     | 8.92      | 29        |           |                        |                |                        |

**Table S2** ANOVA for the short-term stability test of the reference material.

| <b>Element</b> | <b>Source of variance</b> | <b>SS</b> | <b>DF</b> | <b>MS</b> | <b>F<sub>cal</sub></b> | <b>p-Value</b> | <b>F<sub>tab</sub></b> |
|----------------|---------------------------|-----------|-----------|-----------|------------------------|----------------|------------------------|
| Ag             | Between-bottle            | 0.0018    | 5         | 0.00036   | 2.73                   | 0.071          | 3.10                   |
|                | Within-bottle             | 0.0016    | 12        | 0.00013   |                        |                |                        |
|                | Total                     | 0.0034    | 17        |           |                        |                |                        |
| Al             | Between-bottle            | 12.50     | 5         | 2.50      | 12.65                  | 0.00019        | 3.10                   |
|                | Within-bottle             | 2.37      | 12        | 0.20      |                        |                |                        |
|                | Total                     | 14.87     | 17        |           |                        |                |                        |
| As             | Between-bottle            | 71.24     | 5         | 14.25     | 2.27                   | 0.11           | 3.10                   |
|                | Within-bottle             | 75.29     | 12        | 6.27      |                        |                |                        |
|                | Total                     | 146.53    | 17        |           |                        |                |                        |
| Au             | Between-bottle            | 6112.73   | 5         | 1222.54   | 0.78                   | 0.58           | 3.10                   |
|                | Within-bottle             | 18779.13  | 12        | 1564.93   |                        |                |                        |
|                | Total                     | 24891.86  | 17        |           |                        |                |                        |
| Ba             | Between-bottle            | 0.022     | 5         | 0.0045    | 1.44                   | 0.28           | 3.10                   |
|                | Within-bottle             | 0.037     | 12        | 0.0031    |                        |                |                        |
|                | Total                     | 0.059     | 17        |           |                        |                |                        |
| Cr             | Between-bottle            | 0.11      | 5         | 0.022     | 2.14                   | 0.13           | 3.10                   |
|                | Within-bottle             | 0.12      | 12        | 0.010     |                        |                |                        |
|                | Total                     | 0.23      | 17        |           |                        |                |                        |
| Cu             | Between-bottle            | 32.80     | 5         | 6.56      | 13.33                  | 0.00015        | 3.10                   |
|                | Within-bottle             | 5.91      | 12        | 0.49      |                        |                |                        |
|                | Total                     | 38.71     | 17        |           |                        |                |                        |

**Table S2** Continuation.

| <b>Element</b> | <b>Source of variance</b> | <b>SS</b> | <b>DF</b> | <b>MS</b> | <b>F<sub>cal</sub></b> | <b>p-Value</b> | <b>F<sub>tab</sub></b> |
|----------------|---------------------------|-----------|-----------|-----------|------------------------|----------------|------------------------|
| Fe             | Between-bottle            | 11.02     | 5         | 2.20      | 2.16                   | 0.13           | 3.10                   |
|                | Within-bottle             | 12.24     | 12        | 1.02      |                        |                |                        |
|                | Total                     | 23.26     | 17        |           |                        |                |                        |
| Ni             | Between-bottle            | 0.0081    | 5         | 0.0016    | 0.44                   | 0.81           | 3.10                   |
|                | Within-bottle             | 0.044     | 12        | 0.0037    |                        |                |                        |
|                | Total                     | 0.052     | 17        |           |                        |                |                        |
| Pb             | Between-bottle            | 0.080     | 5         | 0.016     | 1.63                   | 0.22           | 3.10                   |
|                | Within-bottle             | 0.12      | 12        | 0.0098    |                        |                |                        |
|                | Total                     | 0.20      | 17        |           |                        |                |                        |
| Sb             | Between-bottle            | 0.11      | 5         | 0.022     | 8.80                   | 0.0010         | 3.10                   |
|                | Within-bottle             | 0.030     | 12        | 0.0025    |                        |                |                        |
|                | Total                     | 0.14      | 17        |           |                        |                |                        |
| Si             | Between-bottle            | 1.55      | 5         | 0.31      | 3.63                   | 0.03           | 3.10                   |
|                | Within-bottle             | 1.03      | 12        | 0.08      |                        |                |                        |
|                | Total                     | 2.58      | 17        |           |                        |                |                        |
| Sn             | Between-bottle            | 2.18      | 5         | 0.43      | 2.89                   | 0.061          | 3.10                   |
|                | Within-bottle             | 1.81      | 12        | 0.15      |                        |                |                        |
|                | Total                     | 3.99      | 17        |           |                        |                |                        |
| Zn             | Between-bottle            | 0.75      | 5         | 0.15      | 2.48                   | 0.092          | 3.10                   |
|                | Within-bottle             | 0.73      | 12        | 0.06      |                        |                |                        |
|                | Total                     | 1.48      | 17        |           |                        |                |                        |

**Table S3** ANOVA data for the long-term stability test of the reference material.

| <b>Element</b> | <b>Source of variance</b> | <b>SS</b> | <b>DF</b> | <b>MS</b> | <b>F<sub>cal</sub></b> | <b>p-Value</b> | <b>F<sub>tab</sub></b> |
|----------------|---------------------------|-----------|-----------|-----------|------------------------|----------------|------------------------|
| Ag             | Between-bottle            | 0.0014    | 8         | 0.00017   | 0.30                   | 0.96           | 2.21                   |
|                | Within-bottle             | 0.020     | 36        | 0.00056   |                        |                |                        |
|                | Total                     | 0.021     | 44        |           |                        |                |                        |
| Al             | Between-bottle            | 6.30      | 8         | 0.79      | 2.42                   | 0.033          | 2.21                   |
|                | Within-bottle             | 11.70     | 36        | 0.32      |                        |                |                        |
|                | Total                     | 18.00     | 44        |           |                        |                |                        |
| As             | Between-bottle            | 125.41    | 8         | 15.68     | 0.66                   | 0.72           | 2.21                   |
|                | Within-bottle             | 855.59    | 36        | 23.77     |                        |                |                        |
|                | Total                     | 980.99    | 44        |           |                        |                |                        |
| Au             | Between-bottle            | 14364.32  | 8         | 1795.54   | 0.88                   | 0.54           | 2.21                   |
|                | Within-bottle             | 73546.17  | 36        | 2042.95   |                        |                |                        |
|                | Total                     | 87910.49  | 44        |           |                        |                |                        |
| Ba             | Between-bottle            | 0.079     | 8         | 0.0098    | 1.22                   | 0.31           | 2.21                   |
|                | Within-bottle             | 0.29      | 36        | 0.0080    |                        |                |                        |
|                | Total                     | 0.37      | 44        |           |                        |                |                        |
| Cr             | Between-bottle            | 0.18      | 8         | 0.023     | 1.17                   | 0.34           | 2.21                   |
|                | Within-bottle             | 0.70      | 36        | 0.019     |                        |                |                        |
|                | Total                     | 0.88      | 44        |           |                        |                |                        |
| Cu             | Between-bottle            | 405.92    | 8         | 50.74     | 2.54                   | 0.026          | 2.21                   |
|                | Within-bottle             | 719.42    | 36        | 19.98     |                        |                |                        |
|                | Total                     | 1125.35   | 44        |           |                        |                |                        |

**Table S3** Continuation.

| <b>Element</b> | <b>Source of variance</b> | <b>SS</b> | <b>DF</b> | <b>MS</b> | <b>F<sub>cal</sub></b> | <b>p-Value</b> | <b>F<sub>tab</sub></b> |
|----------------|---------------------------|-----------|-----------|-----------|------------------------|----------------|------------------------|
| Fe             | Between-bottle            | 26.88     | 8         | 3.36      | 1.78                   | 0.11           | 2.21                   |
|                | Within-bottle             | 68.10     | 36        | 1.89      |                        |                |                        |
|                | Total                     | 94.99     | 44        |           |                        |                |                        |
| Ni             | Between-bottle            | 0.097     | 8         | 0.012     | 1.00                   | 0.45           | 2.21                   |
|                | Within-bottle             | 0.43      | 36        | 0.012     |                        |                |                        |
|                | Total                     | 0.53      | 44        |           |                        |                |                        |
| Pb             | Between-bottle            | 0.081     | 8         | 0.010     | 0.61                   | 0.77           | 2.21                   |
|                | Within-bottle             | 0.60      | 36        | 0.017     |                        |                |                        |
|                | Total                     | 0.68      | 44        |           |                        |                |                        |
| Sb             | Between-bottle            | 0.14      | 8         | 0.018     | 2.46                   | 0.031          | 2.21                   |
|                | Within-bottle             | 0.26      | 36        | 0.0073    |                        |                |                        |
|                | Total                     | 0.40      | 44        |           |                        |                |                        |
| Si             | Between-bottle            | 1.73      | 8         | 0.22      | 1.02                   | 0.44           | 2.21                   |
|                | Within-bottle             | 7.67      | 36        | 0.21      |                        |                |                        |
|                | Total                     | 9.40      | 44        |           |                        |                |                        |
| Sn             | Between-bottle            | 5.12      | 8         | 0.64      | 1.33                   | 0.26           | 2.21                   |
|                | Within-bottle             | 17.35     | 36        | 0.48      |                        |                |                        |
|                | Total                     | 22.46     | 44        |           |                        |                |                        |
| Zn             | Between-bottle            | 6.78      | 8         | 0.85      | 1.48                   | 0.20           | 2.21                   |
|                | Within-bottle             | 20.66     | 36        | 0.57      |                        |                |                        |
|                | Total                     | 27.44     | 44        |           |                        |                |                        |

**Table S4** Participating laboratories at collaborative trial

---

Exata Laboratory, GO, Brazil

São Paulo State University (UNESP) – Campus Rio Claro, SP, Brazil

Federal University of Espírito Santo (UFES), ES, Brazil

São Paulo State University (UNESP) – Campus Araraquara, SP, Brazil

Center of Nuclear Energy in Agriculture (CENA), University of São Paulo, Piracicaba, SP, Brazil

Central laboratory division of Eletrobras Eletronorte (OTLPL), PA, Brazil

Federal University of Bahia (UFBA), BA, Brazil

Information Technology Center Renato Archer (CTI Renato Archer), SP, Brazil

Federal University of Paraná (UFPR), PR, Brazil

Federal University of Ceará (UFC), CE, Brazil

Sinergia Laboratory, MS, Brazil

Laboratory of Poços de Caldas (LAPOC), National Nuclear Energy Commission (CNEN), MG, Brazil

---



## Caption for figures

**Figure S1** Univariate linear models for long-term stability testing.

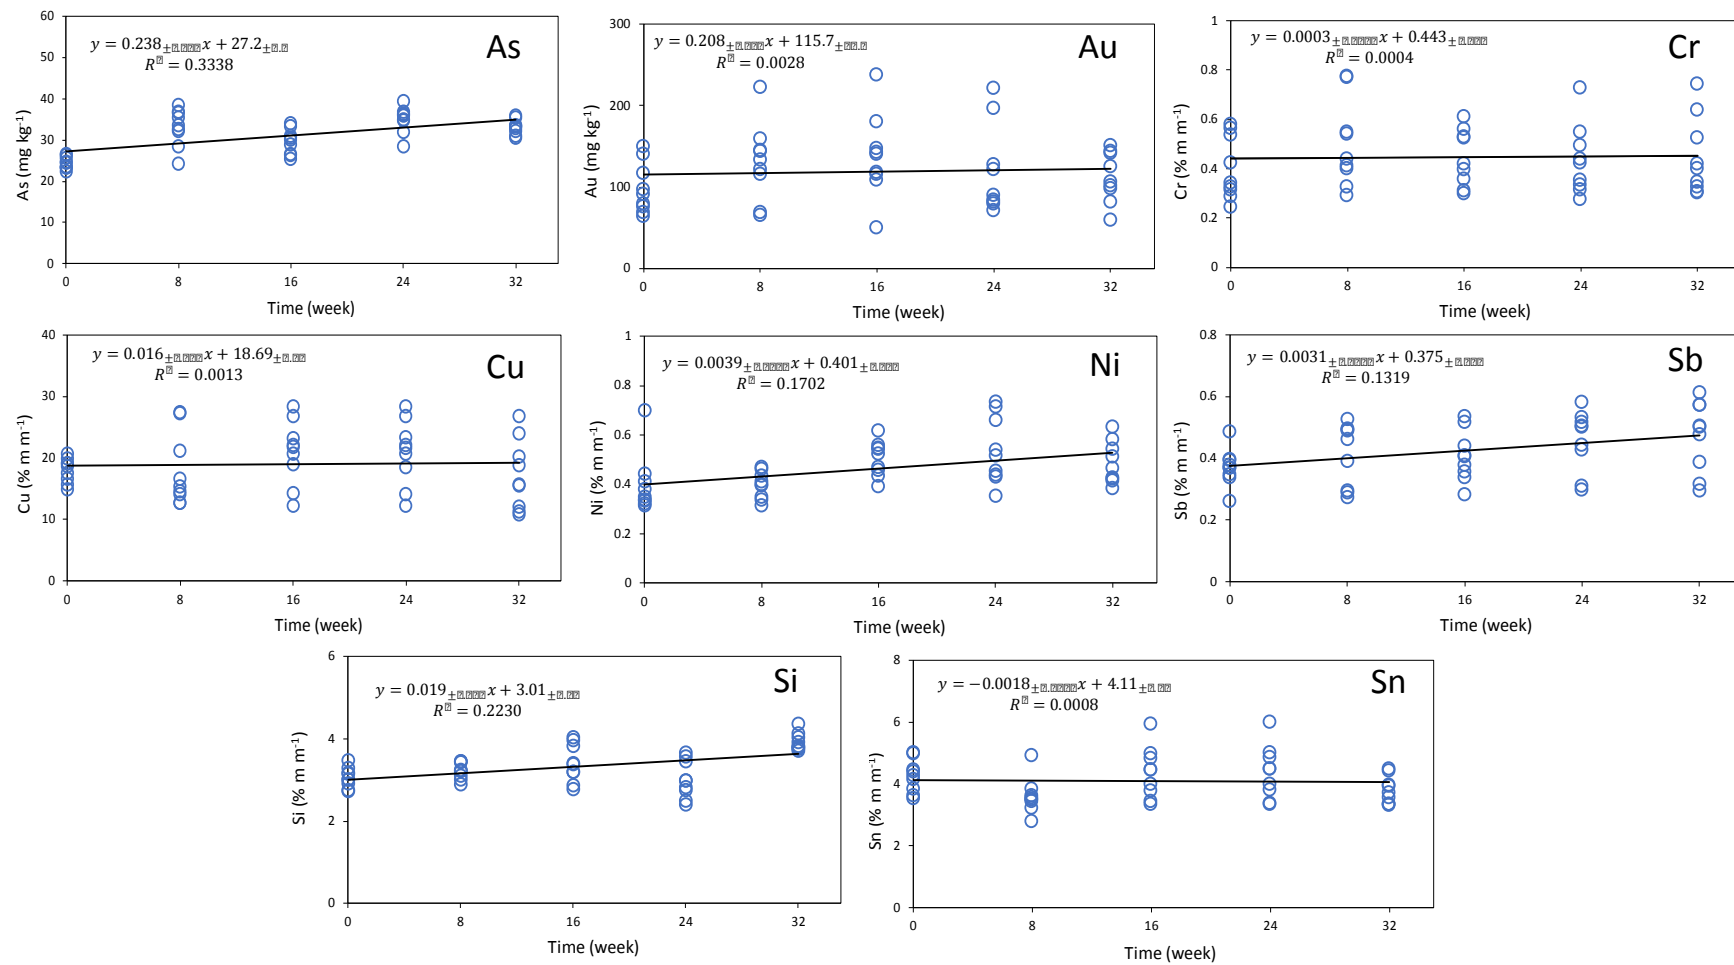

Supplement: c9ja00284g1.pdf [file c9ja00284g1.pdf]
